# Supplementary material
Source: HighWire-hosted journal article supplement (https://jech.bmj.com/content/jech-2018-211063)
Supplement: inline-supplementary-material-1 [file inline-supplementary-material-1.pdf]

**Title:** The prospective relationship between social cohesion and depressive symptoms among older adults from Central and Eastern Europe

**List of Authors:** Carla Bertossi Urzua\*<sup>1</sup>, Milagros A Ruiz\*<sup>1</sup>, Andrzej Pajak<sup>2</sup>, Magdalena Kozela<sup>2</sup>, Ruzena Kubinova<sup>3</sup>, Sofia Malyutina<sup>4,5</sup>, Anne Peasey<sup>1</sup>, Hynek Pikhart<sup>1</sup>, Michael Marmot<sup>1,6</sup>, Martin Bobak<sup>1</sup>

*\*Joint first authors*

**Author Affiliations:** <sup>1</sup>Research Department of Epidemiology and Public Health, University College London, London, United Kingdom; <sup>2</sup>Institute of Public Health, Faculty of Health Sciences, Jagiellonian University Medical College, Krakow, Poland; <sup>3</sup>Centre for Environmental Health Monitoring, National Institute of Public Health, Prague, Czech Republic; <sup>4</sup>Research Institute of Internal and Preventive Medicine, Branch of the Institute of Cytology and Genetics, SB RAS, Novosibirsk, Russia; <sup>5</sup>Novosibirsk State Medical University, Novosibirsk, Russia; <sup>6</sup>UCL Institute of Health Equity and Research Department of Epidemiology and Public Health, University College London, London, United Kingdom

^Correspondence to [m.a.ruiz@ucl.ac.uk](mailto:m.a.ruiz@ucl.ac.uk)

## Supplementary Figure and Tables

|           |                                                                                                                                                      |   |
|-----------|------------------------------------------------------------------------------------------------------------------------------------------------------|---|
| Figure S1 | Selection diagram of analytic sample.....                                                                                                            | 2 |
| Table S1  | Analytic sample characteristics between complete (N=15,438) and incomplete cases due to missing data (n=2,584) or loss to follow-up (n=10,932) ..... | 3 |
| Table S2  | Odds ratios (ORs) of being an incomplete case due to missing data or loss to follow-up by analysis variables .....                                   | 4 |

Figure S1 Selection diagram of analytic sample

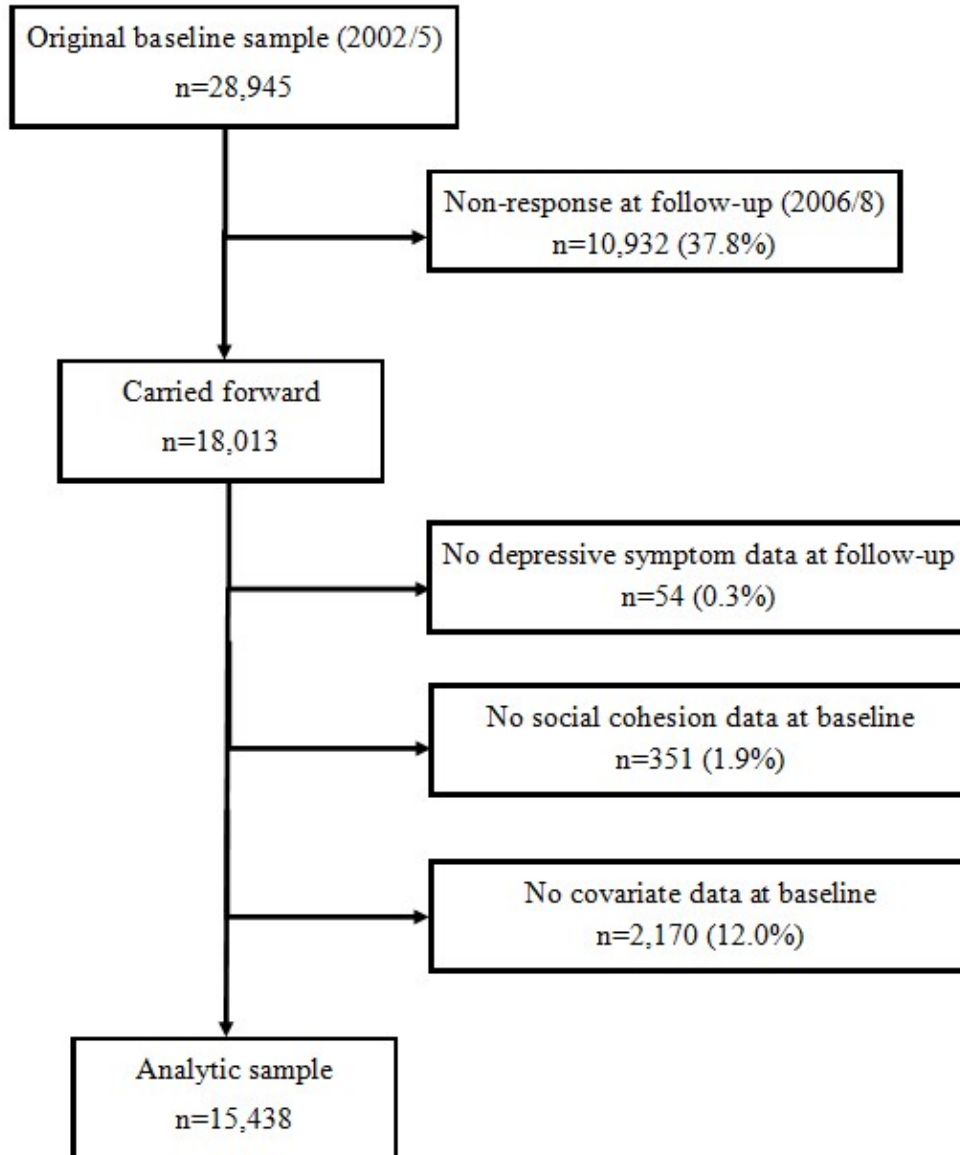

**Table S1 Analytic sample characteristics between complete (N=15,438) and incomplete cases due to missing data (n=2,584) or loss to follow-up (n=10,932)**

| Study data*                                                 | Complete cases<br>(N=15,438) | Incomplete cases<br>(N=13,516) | P-value |
|-------------------------------------------------------------|------------------------------|--------------------------------|---------|
| <b>Follow-up measures (2006/8)</b>                          |                              |                                |         |
| Elevated depressive symptoms (CES-D 10 score $\geq$ 4) (%)  | 25.2                         | 33.9                           | <0.001  |
| <b>Baseline measures (2002/5)</b>                           |                              |                                |         |
| Mean age (years)*                                           | 57.9                         | 58.1                           | 0.0212  |
| Female (%)*                                                 | 54.0                         | 51.7                           | <0.001  |
| Country (%)*                                                |                              |                                |         |
| Czech Republic                                              | 30.2                         | 31.0                           |         |
| Russia                                                      | 30.0                         | 35.0                           |         |
| Poland                                                      | 39.8                         | 34.0                           | <0.001  |
| Median social cohesion score (5-25)                         | 20                           | 20                             | <0.001  |
| Social cohesion tertiles (%)                                |                              |                                |         |
| High (21-25)                                                | 40.7                         | 36.7                           |         |
| Medium (18-20)                                              | 32.4                         | 32.8                           |         |
| Low (5-17)                                                  | 26.9                         | 30.5                           | <0.001  |
| Drinking frequency (%)                                      |                              |                                |         |
| Never                                                       | 19.9                         | 24.3                           |         |
| Less than once a month                                      | 28.6                         | 29.1                           |         |
| One to three times a month                                  | 21.6                         | 19.4                           |         |
| One to four times a week                                    | 23.7                         | 21.1                           |         |
| Five or more times a week                                   | 6.2                          | 6.1                            | <0.001  |
| Smoking status (%)                                          |                              |                                |         |
| Never                                                       | 48.6                         | 45.2                           |         |
| Past                                                        | 24.7                         | 23.0                           |         |
| Current                                                     | 26.7                         | 31.9                           | <0.001  |
| Married or cohabitating (%)                                 | 76.4                         | 72.9                           | <0.001  |
| Educational level (%)                                       |                              |                                |         |
| Primary or less                                             | 8.3                          | 15.2                           |         |
| Vocational                                                  | 26.6                         | 29.2                           |         |
| Secondary                                                   | 38.3                         | 34.5                           |         |
| University                                                  | 26.8                         | 21.2                           | <0.001  |
| Median deprivation score (0-12)                             | 1                            | 2                              | <0.001  |
| Self-rated health (%)                                       |                              |                                |         |
| Very good                                                   | 2.7                          | 2.3                            |         |
| Good                                                        | 28.8                         | 23.5                           |         |
| Fair                                                        | 54.4                         | 55.4                           |         |
| Poor                                                        | 13.2                         | 17.1                           |         |
| Very Poor                                                   | 1.0                          | 1.8                            | <0.001  |
| Median CES-D 20 score (0-60)                                | 0                            | 10                             | <0.001  |
| Elevated depressive symptoms (CES-D 20 score $\geq$ 16) (%) | 22.3                         | 26.6                           | <0.001  |

\* Covariate baseline data on age, sex and country were observed for all participants.

**Table S2 Odds ratios (ORs) of being an incomplete case due to missing data or loss to follow-up by analysis variables**

|                                                        | Model 1 |            |         | Model 2 |            |         | Model 3 |            |         |
|--------------------------------------------------------|---------|------------|---------|---------|------------|---------|---------|------------|---------|
|                                                        | OR      | 95% CI     | P-value | OR      | 95% CI     | P-value | OR      | 95% CI     | P-value |
| <b>Y</b>                                               |         |            |         |         |            |         |         |            |         |
| Elevated depressive symptoms (CES-D 10 score $\geq$ 4) | 0.79    | 0.60, 1.04 | 0.093   | 0.82    | 0.57, 1.20 | 0.313   | 0.83    | 0.54, 1.29 | 0.417   |
| <b>X</b>                                               |         |            |         |         |            |         |         |            |         |
| Social cohesion z-score                                | 0.88    | 0.79, 0.98 | 0.024   | 0.90    | 0.77, 1.04 | 0.150   | 1.14    | 0.98, 1.04 | 0.157   |
| <b>C</b>                                               |         |            |         |         |            |         |         |            |         |
| Age*                                                   | 1.02    | 1.01, 1.04 | 0.001   | 1.02    | 1.00, 1.04 | 0.078   | 1.01    | 0.98, 1.04 | 0.437   |
| Female*                                                | 1.11    | 1.23, 1.71 | 0.329   | 1.49    | 1.09, 2.04 | 0.011   | 1.70    | 1.11, 2.60 | 0.015   |
| Country*                                               | 0.81    | 0.71, 0.92 | 0.001   | 0.79    | 0.66, 0.94 | 0.008   | 0.86    | 0.69, 1.07 | 0.170   |
| CES-D 20 score (0-60)                                  | 1.00    | 0.99, 1.01 | 0.857   | 1.00    | 0.99, 1.03 | 0.541   | 1.01    | 0.99, 1.03 | 0.268   |
| Married or cohabitating                                | -       | -          | -       | 0.77    | 0.56, 1.07 | 0.120   | 0.66    | 0.45, 0.96 | 0.028   |
| Educational level                                      | -       | -          | -       | 1.18    | 1.01, 1.39 | 0.034   | 1.01    | 0.83, 1.22 | 0.935   |
| Deprivation score                                      | -       | -          | -       | 0.99    | 0.94, 1.05 | 0.700   | 0.97    | 0.91, 1.04 | 0.391   |
| Self-rated health                                      | -       | -          | -       | 0.76    | 0.61, 0.94 | 0.013   | 0.68    | 0.52, 0.88 | 0.004   |
| Drinking frequency                                     | -       | -          | -       | -       | -          | -       | 0.76    | 0.64, 0.91 | 0.002   |
| Smoking status                                         | -       | -          | -       | -       | -          | -       | 1.00    | 0.80, 1.24 | 0.977   |

\* Covariate was observed for all participants.
